# Supplementary material
Source: publisher figshare collection journal article supplement (https://gsajournals.figshare.com/ndownloader/files/24540992)
Supplement: Supplementary file 1 [file 24540992]

|  | | |  |  |  |
| --- | --- | --- | --- | --- | --- |
| **Supplemental Table 1: Strain List** | | | | |  |
| *dim* mutants derived from:  N2977 (*his-3RIP::barM::his-3RIP, mat a; am132, inl; amRIP::hphM::amRIP*) | | | | |  |
| *dim* mutant | mutation found | DNA methylation status | method | Collection Number | strain number (alternate name) |
| *dim-5* | P137L | weak partial loss | Comp., Sanger | N7008 | xAM1.6 |
| *dim-9* | I758fs | complete loss | Comp., Sanger | N5308 | xAM2.1 |
| *dim-9* | E161stop | complete loss | Comp., Sanger | N5309 | xAM7.4 |
| *dim-9* | S741stop | complete loss | BSA, WGS, EC | N5310 | xAM9.6 |
| *dim-7* | E514dup13bp | complete loss | Comp., Sanger | N5311 | xAM10.2 |
| *dim-9* | E436K | weak partial loss | Comp., Sanger | N7009 | xAM11-4 |
| novel? maps to LGI or LGVII. |  | complete loss | WGS | N5312 | xAM12.1 |
| *dim-1* | F826S | weak partial loss | BSA, WGS, EC | N6983 | xAM16-5 |
| *dim-9* | V477D; L478I | complete loss, spreading | BSA, WGS, EC | N5362 | xAM22.1 |
| *dim-7* | stop666E+16aa | weak partial loss | Comp., Sanger | N5363, N5364 | xAM24.1, xAM24.3 |
| *dim-9* | C918Y | weak partial loss | Comp., Sanger | N7010, N7011 | xAM27-2, xAM27-3 |
| *dim-5* | C25R | complete loss | Comp., Sanger | N5313 | xAM28.6 |
| *dim-9* | K1003stop | complete loss | BSA, WGS, EC | N5314 | xAM31.1 |
| *hda-1* | L430fs | complete loss, spreading | Comp., Sanger | N5315 | xAM32.1 |
| *chap* | I372stop | complete loss, spreading | Comp., Sanger | N5316 | xAM34-1 |
| *dim-7* | L448stop | complete loss | Comp., Sanger | N5317, N5318 | xAM35.1, xAM35.3 |
| *dim-9* | N534K; S535stop | complete loss | Comp., Sanger | N5319 | xAM36.5 |
| *hda-1* | Q13stop | complete loss, spreading | Comp., Sanger | N5320 | xAM37.6 |
| *hda-1* | H83Y | complete loss, spreading | Comp., Sanger | N5321 | xAM38-2 |
| *dim-7* | stop666E+16aa | weak partial loss | Comp., Sanger | N5322 | xAM39.3 |
| *dim-9* | W574stop | complete loss | Comp., Sanger | N7012 | xAM41-5 |
| *dim-9* | H629Y; P634S | complete loss | Comp., Sanger | N5323 | xAM42.4 |
| *dim-9* | Intronic: nt977, nt978 | complete loss | Comp., Sanger | N5324 | xAM43.4 |
| *chap* | K207stop | complete loss, spreading | Comp., Sanger | N5359 | xAM44.1 |
| *hda-1* | E49fs | complete loss, spreading | Comp., Sanger | N5358 | xAM45.2 |
| *hda-1* | N571fs | complete loss, spreading | Comp., Sanger | N5325 | xAM48.1 |
| *chap* | S354fs | complete loss, spreading | Comp., Sanger | N7013 | xAM49.4 |
| *hda-1* | P222R | complete loss | Comp., Sanger | N5326 | xAM51.3 |
| *dim-7* | stop666S+16aa | partial loss | Comp., Sanger | N5357 | xAM53.5 |
| *hda-1* | Intronic: nt 1744 | partial loss, spreading | Comp., Sanger | N5356 | xAM62.2 |
| *dim-7* | L385stop | complete loss | Comp., Sanger | N6990 | xAM63.5 |
| *dim-9* | H629Y | partial loss | BSA, WGS, EC | N5327 | xAM67.3 |
| *dim-9* | V635fs | complete loss | Comp., Sanger | N5365,N5466 | xAM68.3, xAM68.5 |
| novel? mutation mapped to LGVI |  | complete loss | WGS | N5367,N5368 | xAM69.2, xAM69.5 |
| *cdp-2* | E15fs | complete loss, spreading | Comp., Sanger | N5369,N5370 | xAM70.3, xAM70.4 |
| *dim-10 (novel)* | NCU04423 (nt 1570, position 3415853; intronic) | weak partial loss | BSA, WGS, Reintroduced | N6991, N6992 | xAM71-3, xAM71-4 |
| *dim-9* | H667fs | complete loss | Comp., Sanger | N6993 | xAM73.4 |
| *dim-7* | F222del5nt-fs | complete loss | Comp., Sanger | N6994 | xAM74.4 |
| *dim-7* | L448stop | complete loss | Comp., Sanger | N6995 | xAM75.1 |
| *hda-1* | Intronic: nt1744 | partial loss, spreading | Comp., Sanger | N5306 | xAM77.3 |
| *dim-9* | G616R | complete loss | Comp., Sanger | N6996 | xAM78.3 |
| *dim-7* | stop666E+16aa | weak partial loss | BSA, WGS, EC | N5307 | xAM80.3 |
| *hda-1* | S701fs | complete loss, spreading | Comp., Sanger | N5371 | xAM82.10 |
| *dim-9* | P296fs. | complete loss | Comp., Sanger | N6997 | xAM83.4 |
| *dim-7* | Y394stop | complete loss | Comp., Sanger | N5360 | xAM92.4 |
| *dim-9* | V951fs | complete loss | Comp., Sanger | N5355 | xAM107.1 |
| *dim-9* | A515P; L516fs | complete loss | Comp., Sanger | N6998 | xAM108.5 |
| novel |  | partial loss | WGS | N5372, N6999 | xAM110.3, xAM110-A1 |
| *dim-9* | Intronic: nt976 | weak partial loss | Comp., Sanger | N7000, N7001 | xAM114-1, xAM114-3 |
| *dim-9* | T542in83nt+fs | weak partial loss (heterokaryotic?) | Comp., Sanger | N7002 | xAM119-4 |
| *dim-5* | C79G | complete loss | Comp., Sanger | N5328 | xAM121.1 |
| *chap* | W214stop | complete loss, spreading | Comp., Sanger | N5329 | xAM122.1 |
| *hda-1* | F191fs | complete loss, spreading | Comp., Sanger | N5330 | xAM123.3 |
| *dim-8* | E649fs | complete loss | Comp., Sanger | N5373 | xAM125.2 |
| *dim-9* | Y521stop | complete loss | Comp., Sanger | N5354 | xAM126.4 |
| *dim-9* | Q883stop | complete loss | BSA, WGS, EC | N5353 | xAM127.2 |
| *dim-9* | Q883stop | complete loss | Comp., Sanger | N7003 | xAM128.1 |
| *dim-9* | L1118stop | complete loss | BSA, WGS, EC | N5331 | xAM130.5 |
| *dim-5* | M246K | complete loss | BSA, WGS, EC | N5332 | xAM132.8 |
| *dim-8* | L302S | complete loss at 8:A6, partial loss at 2:B3 | WGS, Comp. | N5352 | xAM133.5 |
| *hda-1* | G331stop | complete loss, spreading | Comp., Sanger | N5374 | xAM134.6 |
| *dim-9* | L1161fs | complete loss | Comp., Sanger | N5377 | xAM135.6 |
| *dim-9* | R336stop | complete loss | BSA, WGS, EC | N5333 | xAM136.5 |
| *dim-7* | L448stop | complete loss | Comp., Sanger | N5375 | xAM137.10 |
| *dim-9* | L509fs | complete loss | Comp., Sanger | N7004 | xAM138.A1 |
| *dim-7* | stop666E+16aa | weak partial loss | Comp., Sanger | N5334 | xAM139.1 |
| *hda-1* | G269R | complete loss, spreading | Comp., Sanger | N5335 | xAM140.1 |
| *hda-1* | Intron, nt 1756 | complete loss, spreading | Comp., Sanger | N5336 | xAM141.1 |
| *hH3* | S10F | complete loss | BSA, WGS, EC | N5351 | xAM143.5 |
| *hda-1* | V398A; C399stop | complete loss, spreading | Comp., Sanger | N5337 | xAM144.1 |
| *hda-1* | P222L | complete loss, spreading | Comp., Sanger | N5338 | xAM145.1 |
| *dim-7* | stop666L+16aa | complete loss | Comp., Sanger | N5339 | xAM146.1 |
| *dim-9* | R336stop | complete loss | BSA, WGS, EC | N5340 | xAM148.5 |
| *dim-9* | R336stop | complete loss | Comp., Sanger | N5341 | xAM149.9 |
| *dim-8* | R334in1446nt | partial loss - mixed nuclei? | Comp., Sanger | N7005 | xAM150-4 |
| *dim-9* | S535stop | complete loss | Comp., Sanger | N5379 | xAM151.7 |
| novel, maps to LGI |  | complete loss | BSA, WGS | N5342 | xAM152-4 |
| *dim-9* | S798W | near complete loss | Comp., Sanger | N5376 | xAM155.4 |
| *dim-9* | N604Y | complete loss | BSA, WGS, EC | N5343 | xAM157.5 |
| *dim-10 (novel)* | large (~32kb) deletion on LGIV, encompasses genes NCU04424 to NCU04416 | weak partial loss | BSA, WGS | N7006 | xAM159-k10 |
| *dim-7* | stop666E+16aa | partial loss | Comp., Sanger | N5344 | xAM160.2 |
| *hda-1* | Intronic: nt1849, nt1850 | complete loss, spreading | Comp., Sanger | N5345 | xAM161.3 |
| *hda-1* | T250I; Intronic: nt1742 | complete loss, spreading | Comp., Sanger | N5346 | xAM163.1 |
| *dim-9* | V972E | complete loss | Comp., Sanger |  | xAM165.2 |
| *dim-9* | R336stop | complete loss | Comp., Sanger | N7007 | xAM166-A1 |
| *dim-9* | T702fs | complete loss | Comp., Sanger | N7014 | xAM167.A1 |
| *dim-7* | stop666E+16aa | weak partial loss | Comp., Sanger | N7015 | xAM168-3 |
| *hda-1* | P95S | weak partial loss | Comp., Sanger | N7016 | xAM169-2 |
| *dim-9* | Intronic: nt974 | complete loss | Comp., Sanger |  | xAM170.1 |
| *dim-7, extragenic* | dim-7 extragenic | complete loss | BSA, EC + comp. | N7017 | xAM171.A5 |
| *dim-9* | R336stop | complete loss | Comp., Sanger | N7018 | xAM172.A1 |
| *hda-1* | S174fs | complete loss, spreading | Comp., Sanger | N5347 | xAM173.1 |
| *dim-9* | F164fs | complete loss | BSA, WGS, EC | N5378 | xAM175.5 |
| *dim-7* | S116P | complete loss | BSA, WGS, EC | N5883 | xAM177.A1 |
| *hda-1* | I359fs | complete loss, spreading | Comp., Sanger | N5348 | xAM178.2 |
| *dim-9* | S1076fs | complete loss | Comp., Sanger | N7019 | xAM179-1 |
| *cdp-2* | V92fs | complete loss, spreading | Comp., Sanger | N5349 | xAM182.3 |
| *hda-1* | S23stop | complete loss, spreading | Comp., Sanger | N5350 | xAM183.2 |
| *dim-9* | K48fs | complete loss | Comp., Sanger | N7020 | xAM311 |
| *chap* | R208fs | complete loss, spreading | Comp., Sanger | N7021 | xKG1-2 |
| *chap* | Q186stop | complete loss, spreading | BSA, WGS, EC | N7022 | LP3 |
| *dim-9* | E894K | partial loss | BSA, WGS, EC | N7023 | LP7 |
| *dim-9* | L786fs | complete loss | WGS, EC | N7024 | LP14m |
| *chap* | Q186stop | complete loss, spreading | BSA, WGS, EC | N7025 | LP28 |
| *dim-8* | I261K | partial loss | Comp., Sanger | N7026 | AS23-6 |
| *hda-1* | N652fs | complete loss, spreading | Comp., Sanger | N7027 | AS43-2 |
| *chap* | P191fs | complete loss, spreading | Comp., Sanger | N7028 | AS49-6 |
| *dim-8* | S464in4nt,fs | complete loss | Comp., Sanger |  | xKG19 |
| *hda-1* | S23stop | complete loss, spreading | Comp., Sanger |  | xKG40.2 |
| Novel? Maps to LGII, LGV |  | partial loss | BSA, WGS | N7029 | xKG47.2 |
| *dim-7* | stop666E+16aa | partial loss | Comp., Sanger |  | xKG52.2 |
| *hda-1* | N281inTN | complete loss, spreading | Comp., Sanger |  | xKG53.2 |
| *dim-7* | stop666E+16aa | partial loss | Comp., Sanger |  | xKG54.1 |
| *dim-7* | stop666K+16aa | partial loss | Comp., Sanger | N5903 | xKG55.1 |
| *hpo* | A204D | loss | Comp., Sanger | N7030 | xKG58A-8 |
| *dim-8* | L461in56nt | loss | Comp., Sanger |  | xKG61.1 |
| *dim-5* | I263L | loss | Comp., Sanger |  | xKG63.11 |
| *dim-1* | M789R | partial loss | BSA, WGS, EC | N6982 | xCL15-2 |
| *cdp-2* | R64stop | complete loss, spreading | Comp., Sanger | N7031 | Bi410-1.A |
| *dim-9* | G595W | complete loss | Comp., Sanger | N7032 | Bi410-2.A |
| *dim-9* | L1118stop | complete loss | Comp., Sanger | N7033 | Bi410-4.A |
| *dim-9* | K461stop | complete loss | Comp., Sanger | N7034 | Bi410-5.C |
| *dim-9* | S657in2nt | complete loss | Comp., Sanger | N7035 | Bi410-6.D |
| *dim-7* | stop666E+16aa | partial loss | Comp., Sanger | N7036 | Bi410-9.A |
| *dim-9* | P1058fs | complete loss | Comp., Sanger | N7037 | Bi410-10.A |
| *dim-9* | S968C | partial loss | Comp., Sanger | N7038 | Bi410-14.B |
| *dim-9* | Q73stop | complete loss | Comp., Sanger | N7039 | Bi410-15.A |
| *novel* |  | partial loss | preliminarily examined | N7040 | Bi410-17.A |
| *hda-1* | C399S; del2nt-fs | complete loss, spreading | Comp., Sanger | N7041 | Bi410-18.A |
| *cdp-2* | K23F;in1nt-fs | complete loss, spreading | Comp., Sanger | N7042 | Bi410-19.B |
| *dim-9* | F879L | complete loss | BSA, WGS, EC | N7043 | Bi410-24.A |
| *hda-1* | S23stop | complete loss, spreading(?) | Comp., Sanger | N7044 | Bi410-26.A |
| *chap (carbon ion)* | C275Y | complete loss, spreading | Comp., Sanger | N7045 | xShin2.A |
| *chap (carbon ion)* | A468T (two point mutations, one is silent) | complete loss, spreading | Comp., Sanger | N7046 | xShin6.A |
|  |  |  |  |  |  |
| Additional Strains used |  |  |  |  |  |
| number | alternate names | genotype | reference |  |  |
| N51 |  | *Mauriceville 1C-A (mat A)* |  |  |  |
| N150 |  | *74-OR23-IV (mat A)* |  |  |  |
| N2194 |  | *mat a his-3; dim-3* | Klocko et al., 2015 |  |  |
| N2264 |  | *mat a his-3; dim-5; leu-2; pan-1* | Tamaru et al., 2003 |  |  |
| N2930 |  | *mat A his-3;* Δ*mus-52::bar* | Ninomiya et al., 2004 |  |  |
| N3256 |  | *mat A sad-1 his-3RIP::barM::his-3RIP* | Lewis et al., 2010 |  |  |
| N3756 |  | *mat A sad-1 his-3* | Lewis et al., 2010 |  |  |
| N3409 |  | *mat ? his-3RIP::barM::his-3RIP; dim-7*; am132? inl?; amRIP::hphM::amRIP* | Lewis et al., 2010 |  |  |
| N3963 |  | *mat A; trp-2;* Δ*dim-2* | Klocko et al, 2019 |  |  |
| N3964 |  | *mat A;* Δ*dim-5; trp-2* | this work |  |  |
| N3965 |  | *mat A;* Δ*dim-8; trp-2* | this work |  |  |
| N3966 |  | *mat A;* Δ*dim-9; trp-2* | this work |  |  |
| N3967 |  | *mat A;* Δ*hda-1; trp-2* | this work |  |  |
| N3968 |  | *mat A; hpoRIP trp-2* | this work |  |  |
| N3969 |  | *mat A;* Δ*dim-7; trp-2* | this work |  |  |
| N4037 |  | *mat A sad-1*  *his-3RIP::barM::his-3RIP; hpoRIP trp-2* | Honda et al., 2012? |  |  |
| N4038 |  | *mat A sad-1*  *his-3RIP::barM::his-3RIP; dim-2* | Honda et al., 2012? |  |  |
| N4635 |  | *mat A; cul4RIP; trp-2* | this work |  |  |
| N4956 | xAK12-2 | *mat ? his-3+::Pdim-5::dim-5::dam* | Klocko et al, 2015 |  |  |
| N5092 |  | *mat A* Δ*cdp-2; trp-2* | this work |  |  |
| N5093 |  | *mat A;* Δ*chap; trp-2* | this work |  |  |
| N5576 |  | *mat A; amRIP-hphM-amRIP* | this work |  |  |
| N5602 |  | *mat A; hpoRIP2; amRIP-hphM-amRIP* | this work |  |  |
| N5601 |  | *mat A; dim-2 amRIP-hphM-amRIP* | this work |  |  |
| N7047 | xAM9-A1 | *mat ? his-3; dim-9*; am132? inl?; amRIP::hphM::amRIP* | this work |  |  |
| N7048 | xAM12-A3 | *mat ? his-3; novel dim*; am132? inl?; amRIP::hphM::amRIP* | this work |  |  |
| N7049 | xAM22.A1 | *mat ? his-3; dim-9*; am132? inl?; amRIP::hphM::amRIP* | this work |  |  |
| N7050 | xAM67.A1 | *mat ? his-3; dim-9*; am132? inl?; amRIP::hphM::amRIP* | this work |  |  |
| N7051 | xAM80-A2 | *mat ? his-3; dim-7*; am132? inl?; amRIP::hphM::amRIP* | this work |  |  |
| N7052 | xAM127-A1 | *mat ? his-3; dim-9*; am132? inl?; amRIP::hphM::amRIP* | this work |  |  |
| N7053 | xAM130-A1 | *mat ? his-3; dim-9*; am132? inl?; amRIP::hphM::amRIP* | this work |  |  |
| N7054 | xAM132-A1 | *mat ? his-3; dim-5*; am132? inl?; amRIP::hphM::amRIP* | this work |  |  |
| N7055 | xAM133.A3 | *mat ? his-3; dim-8*; am132? inl?; amRIP::hphM::amRIP* | this work |  |  |
| N7056 | xAM136-A4 | *mat ? his-3; dim-9*; am132? inl?; amRIP::hphM::amRIP* | this work |  |  |
| N7057 | xAM143-A4 (his-3) | *mat ? his-3; hH3(S10F); am132? inl?; amRIP::hphM::amRIP* | this work |  |  |
| N7058 | xAM148-A2 | *mat ? his-3; dim-9*; am132? inl?; amRIP::hphM::amRIP* | this work |  |  |
| N7059 | xAM152-A2 | *mat ? his-3; am132? inl?; amRIP::hphM::amRIP; dim-2** | this work |  |  |
| N5615 | xAM157-3 | *mat ? his-3; dim-9*; am132? inl?; amRIP::hphM::amRIP* | this work |  |  |
| N7060 | xAM171-A1 | *mat ? his-3; dim-7*; am132? inl?; amRIP::hphM::amRIP* | this work |  |  |
| N7061 | xAM175-A4 | *mat ? his-3; dim-9*; am132? inl?; amRIP::hphM::amRIP* | this work |  |  |
| N7062 | xAM177-A3 | *mat ? his-3; dim-7*; am132? inl?; amRIP::hphM::amRIP* | this work |  |  |
| N7063 | xAK531-10 (LP3derived) | *mat ? his-3; chap*; am132? inl?; amRIP::hphM::amRIP* | this work |  |  |
| N7064 | xAK532-1 (LP7 derived) | *mat ? his-3; dim-9*; am132? inl?; amRIP::hphM::amRIP* | this work |  |  |
| N7065 | xAK533-8 (LP28 derived) | *mat ? his-3; chap*; am132? inl?; amRIP::hphM::amRIP* | this work |  |  |
| N7066 | xCL15-A1 | *mat ? his-3; dim-1*; am132? inl?; amRIP::hphM::amRIP* | this work |  |  |
| N7067 | Bi410-24.A_His11 | *mat ? his-3; dim-9*; am132? inl?; amRIP::hphM::amRIP* | this work |  |  |
| N7068 | xAM110-A2 | *mat ? his-3; novel dim*; am132? inl?; amRIP::hphM::amRIP* | this work |  |  |
| N7069 | xAM9-A1 + dim-9 (tAK212-6) | *mat ? his-3+::dim-9+; dim-9*; am132? inl?; amRIP::hphM::amRIP* | this work |  |  |
| N7070 | xAM16-3 + dim-1 + bmlR frag (tAK234-2) | *mat ?; his-3RIP::bar::his-3RIP; dim-1*; am132? inl?; amRIP::hphM::amRIP; ::dim-1; ::bmlR* | this work |  |  |
| N7071 | xAM22.A1 + dim-9 | *mat ? his-3+::dim-9+; dim-9*; am132? inl?; amRIP::hphM::amRIP* | this work |  |  |
| N7072 | xAM67.A1 + dim-9 (tRP19-8) | *mat ? his-3+::dim-9+; dim-9*; am132? inl?; amRIP::hphM::amRIP* | this work |  |  |
| N7073 | xAM80-A2 + dim-7 | *mat ? his-3+::dim-7+; dim-7*; am132? inl?; amRIP::hphM::amRIP* | this work |  |  |
| N7074 | xAM127-A1 + dim-9 (tAK227-3) | *mat ? his-3+::dim-9+; dim-9*; am132? inl?; amRIP::hphM::amRIP* | this work |  |  |
| N7075 | xAM130-A1 + dim-9 (tAK206-5) | *mat ? his-3+::dim-9+; dim-9*; am132? inl?; amRIP::hphM::amRIP* | this work |  |  |
| N7076 | xAM132-A1 + dim-5 (tAK213-4) | *mat ? his-3+::dim-5+; dim-5*; am132? inl?; amRIP::hphM::amRIP* | this work |  |  |
| N7077 | xAM136-A4 + dim-9 (tAK221-3) | *mat ? his-3+::dim-9+; dim-9*; am132? inl?; amRIP::hphM::amRIP* | this work |  |  |
| N7078 | N2930 + hH3 S10F (tAK210-2) | *mat A his-3+::hH3(S10F);* Δ*mus-52::bar* | this work |  |  |
| N7079 | xAM143-A4 + hH3 (tMG9.A1) | *mat ? his-3+::hH3; hH3(S10F); am132? inl?; amRIP::hphM::amRIP* | this work |  |  |
| N7080 | xAM148-A2 + dim-9 | *mat ? his-3+::dim-9+; dim-9*; am132? inl?; amRIP::hphM::amRIP* | this work |  |  |
| N5616 | xAM157-3 + dim-9 | *mat ? his-3+::dim-9+; dim-9*; am132? inl?; amRIP::hphM::amRIP* | this work |  |  |
| N7081 | xAM171-A1 + dim-7 (tMG10.A4) | *mat ? his-3+::dim-7+; dim-7*; am132? inl?; amRIP::hphM::amRIP* | this work |  |  |
| N7082 | xAM171-A1 + dim-7 (tAK197-9) | *mat ? his-3+::dim-7+; dim-7*; am132? inl?; amRIP::hphM::amRIP* | this work |  |  |
| N7083 | xAM175-A4 + dim-9 | *mat ? his-3+::dim-9+; dim-9*; am132? inl?; amRIP::hphM::amRIP* | this work |  |  |
| N7084 | xAM177-A3 + dim-7 | *mat ? his-3+::dim-7+; dim-7*; am132? inl?; amRIP::hphM::amRIP* | this work |  |  |
| N7085 | xAK531-10 (LP3derived) + chap (tAK253-15) | *mat ? his-3+::chap+; chap*; am132? inl?; amRIP::hphM::amRIP* | this work |  |  |
| N7086 | xAK532-1 (LP7 derived) + dim-9 (tAK251-6) | *mat ? his-3+::dim-9+; dim-9*; am132? inl?; amRIP::hphM::amRIP* | this work |  |  |
| N7087 | LP14 + dim-9 (tAK222-11) | *mat ?; dim-9*; am132? inl?; amRIP::hphM::amRIP; ::dim-9; ::pTrpC::nat-1* | this work |  |  |
| N7088 | xAK533-8 (LP28 derived) + chap (tAK252-3) | *mat ? his-3+::chap+; chap*; am132? inl?; amRIP::hphM::amRIP* | this work |  |  |
| N7089 | xCL15-A1 + dim-1 (tAK215-4) | *mat ? his-3+::dim-1+; dim-1*; am132? inl?; amRIP::hphM::amRIP* | this work |  |  |
| N7090 | Bi410-24.A_his11 + dim-9 (tAK228-6) | *mat ? his-3+::dim-9+; dim-9*; am132? inl?; amRIP::hphM::amRIP* | this work |  |  |
| N5570 | xRP48.A6 | *mat ? his-3;* Δ*mus-52::bar?; dim-7+::3xFLAG::hph* | this work |  |  |
| N5571 | xRP47.A4 | *mat ? his-3;* Δ*mus-52::bar?; dim-7W125A::3xFLAG::hph* | this work |  |  |
| N5572 | xRP34.9 | *mat ? his-3;* Δ*mus-52::bar?; dim-7Y141A::3xFLAG::hph* | this work |  |  |
| N5573 | xRP37.6 | *mat ? his-3;* Δ*mus-52::bar?; dim-7E150A::3xFLAG::hph* | this work |  |  |
| N7091 | xRP70.2 | *mat ? his-3;* Δ*mus-52::bar?; dim-7+::hph* | this work |  |  |
| N7092 | xRP72.1 | *mat ? his-3;* Δ*mus-52::bar?; dim-7W125A::hph* | this work |  |  |
| N7093 | xRP74.1 | *mat ? his-3;* Δ*mus-52::bar?; dim-7Y141A::hph* | this work |  |  |
| N7094 | xRP80.1 | *mat ? his-3;* Δ*mus-52::bar?; dim-7E150A::hph* | this work |  |  |
| N5566 | xRP48.4 | *mat ? his-3+::Pdim-5::dim-5::dam;* Δ*mus-52::bar?; dim-7+::3xFLAG::hph* | this work |  |  |
| N5567 | xRP47.11 | *mat ? his-3+::Pdim-5::dim-5::dam;* Δ*mus-52::bar?; dim-7W125A::3xFLAG::hph* | this work |  |  |
| N7095 | xRP69.5 | *mat ? his-3+::Pdim-5::dim-5::dam;* Δ*mus-52::bar?; dim-7+::GFP::hph* | this work |  |  |
| N7096 | xRP91-5 | *mat ? his-3;* Δ*mus-52::bar?; dim-7W125A,Y141A,E150A::hph* | this work |  |  |
| N7097 | xRP83.3 | *mat ? his-3+::LexAOp;* Δ*mus-52::bar?; dim-5::LexADBD::hph* | this work |  |  |
| N7098 | xRP85.6 | *mat ? his-3+::LexAOp;* Δ*mus-52::bar?; dim-5::LexADBD::hph; amRIP::hph::amRIP?* | this work |  |  |
| N7099 | xRP85.12 | *mat ? his-3+::LexAOp;* Δ*mus-52::bar?; dim-5::LexADBD::hph; dim-7stop666L+16aa; amRIP::hph::amRIP?* | this work |  |  |
| N7100 | xRP82.7 | *mat ? his-3+::LexAOp;* Δ*mus-52::bar?; dim-5::LexADBD::hph; dim-7W125A; amRIP::hph::amRIP?* | this work |  |  |
| N6492 | FGSC#17343 | *mat a;* Δ*NCU04423::hph (*Δ*dim-10)* | this work |  |  |
| N6494 | xAK567-1 | *mat ? sad-1?; NCU04423+::3xFLAG::hph* | this work |  |  |
| N6495 | xAK565-2 | *mat ? sad-1?; NCU04423*(dim-10)::3xFLAG::hph* | this work |  |  |
